# Supplementary material for: n-3 PUFA biosynthesis by the copepod Apocyclops royi determined by fatty acid profile and gene expression analysis
Source: Oxford University Press journal article supplement (doi:10.1242/bio.038331), 2019-01-01
Supplement: bio038331supp.pdf [file bio038331supp.pdf]

## Supplementary information

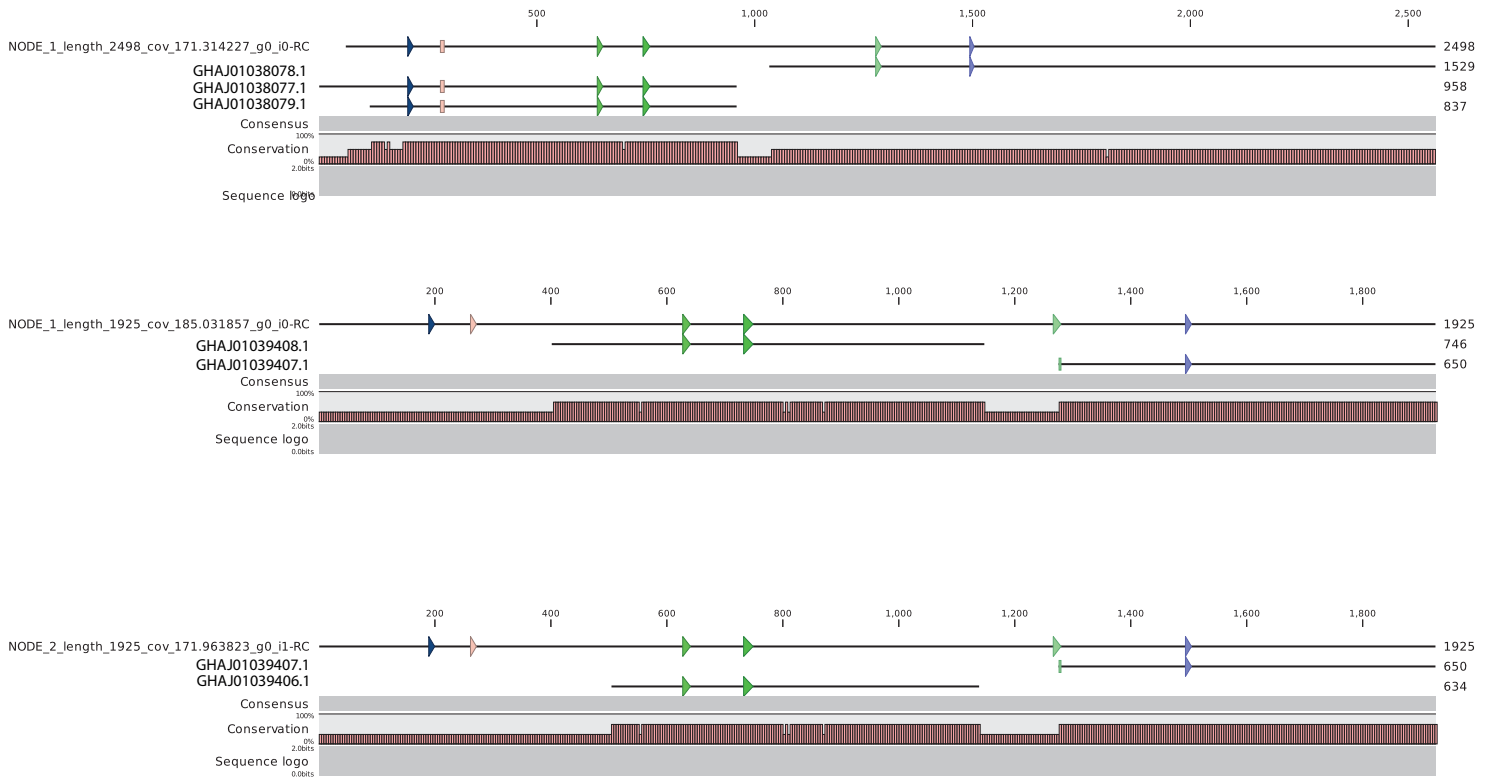

### Figure S1. Aligning the nucleotide sequence of fragmented transcripts to complete genes.

The three complete genes identified as putative front end desaturases were aligned to the initially identified fragmented genes from the GHAJ01 TSA assembly in CLCgenomics. For each complete gene, certain motifs were covered by the fragmented transcripts, but crucially, no fragment-ed gene covered all important front end desaturase motif. Notice that the fragmented isoforms and the complete genes do not share 100% sequence identity, likely because the assembly program faced with short reads with several SNPs had to chose a path through the variation. since Trinity was used for the initial assembly and SPAdes for the complete gene assemble, the results are not identical.

#### Annotation

-  Start codon site
-  Cytochrome b5 HPGG
-  Hisbox1 HDANH
-  Hisbox2 HVVQHH
-  Hisbox3 QIEHH
-  Stop codon site

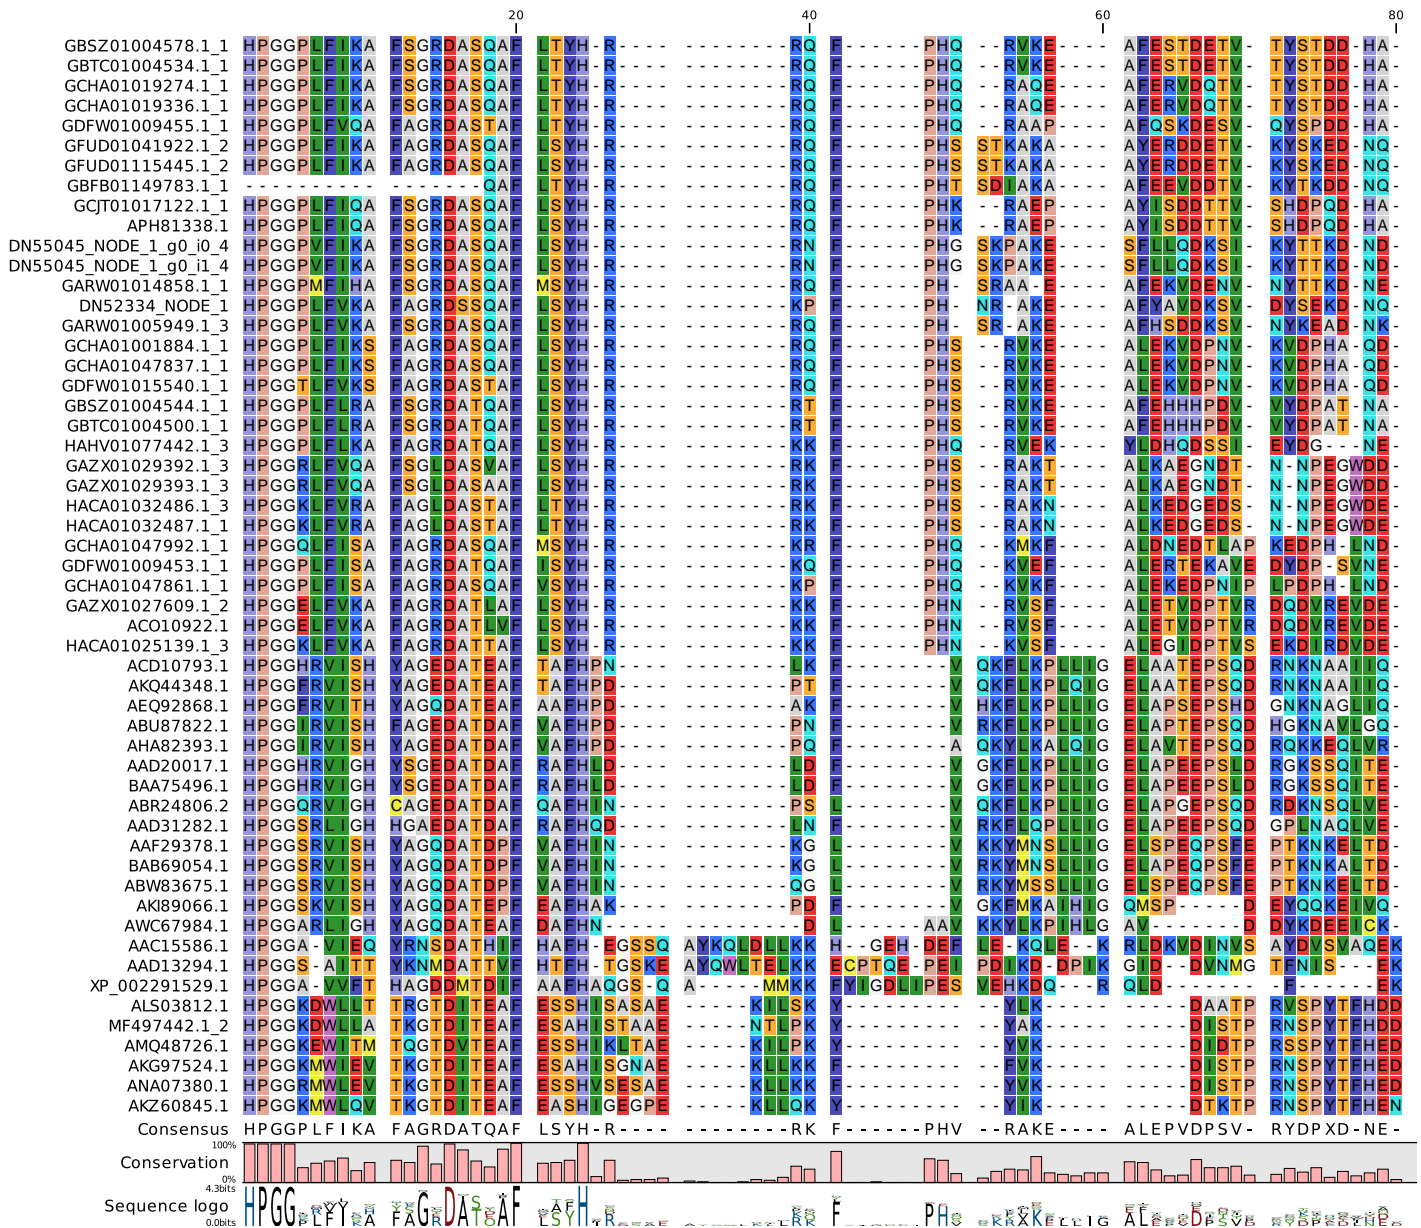

|                        |       |            |    |
|------------------------|-------|------------|----|
| GBSZ01004578.1_1       | ----- | DFI        | 55 |
| GBTC01004534.1_1       | ----- | DFI        | 55 |
| GCHA01019274.1_1       | ----- | DFI        | 55 |
| GCHA01019336.1_1       | ----- | DFI        | 55 |
| GDFW01009455.1_1       | ----- | DFI        | 55 |
| GFUD01041922.1_2       | ----- | DFM        | 57 |
| GFUD01115445.1_2       | ----- | DFM        | 57 |
| GBFB01149783.1_1       | ----- | DFM        | 40 |
| GCT01017122.1_1        | ----- | DFL        | 55 |
| APH81338.1             | ----- | DFL        | 55 |
| DN55045_NODE_1_g0_i0_4 | ----- | DFL        | 57 |
| DN55045_NODE_1_g0_i1_4 | ----- | DFL        | 57 |
| GARW01014858.1_1       | ----- | DFL        | 55 |
| DN52334_NODE_1         | ----- | DFL        | 55 |
| GARW01005949.1_3       | ----- | DFL        | 55 |
| GCHA01001884.1_1       | ----- | DFL        | 55 |
| GCHA01047837.1_1       | ----- | DFL        | 55 |
| GDFW01015540.1_1       | ----- | DFL        | 55 |
| GBSZ01004544.1_1       | ----- | DYL        | 55 |
| GBTC01004500.1_1       | ----- | DYL        | 55 |
| HAHV01077442.1_3       | ----- | DFL        | 53 |
| GAZX01029392.1_3       | ----- | EYL        | 55 |
| GAZX01029393.1_3       | ----- | EYL        | 55 |
| HACA01032486.1_3       | ----- | EYL        | 55 |
| HACA01032487.1_1       | ----- | EYL        | 55 |
| GCHA01047992.1_1       | ----- | DYF        | 56 |
| GDFW01009453.1_1       | ----- | DYF        | 56 |
| GCHA01047861.1_1       | ----- | DFE        | 56 |
| GAZX01027609.1_2       | ----- | DYL        | 57 |
| ACO10922.1             | ----- | DYL        | 57 |
| HACA01025139.1_3       | ----- | DYL        | 57 |
| ACD10793.1             | ----- | DFY        | 62 |
| AKQ44348.1             | ----- | DFH        | 62 |
| AEQ92868.1             | ----- | DFH        | 62 |
| ABU87822.1             | ----- | DFC        | 62 |
| AHA82393.1             | ----- | DFR        | 62 |
| AAD20017.1             | ----- | DFR        | 62 |
| BAA75496.1             | ----- | DFR        | 62 |
| ABR24806.2             | ----- | DFR        | 62 |
| AAD31282.1             | ----- | DFR        | 62 |
| AAF29378.1             | ----- | EFR        | 62 |
| BAB69054.1             | ----- | EFR        | 62 |
| ABW83675.1             | ----- | EFR        | 62 |
| AKI89066.1             | ----- | DLR        | 57 |
| AWC67984.1             | ----- | DFR        | 55 |
| AAC15586.1             | ----- | KMVE-SFE   | 79 |
| AAD13294.1             | ----- | RSQAINKSFT | 81 |
| XP_002291529.1         | ----- | GYR        | 59 |
| ALS03812.1             | GF    | FR         | 58 |
| MF497442.1_2           | GF    | YK         | 58 |
| AMQ48726.1             | GF    | YR         | 58 |
| AKG97524.1             | GF    | YK         | 58 |
| ANA07380.1             | GF    | YK         | 58 |
| AKZ60845.1             | GF    | YK         | 58 |
| Consensus              | ----- | DFL        |    |

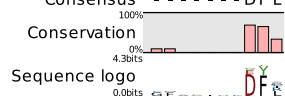

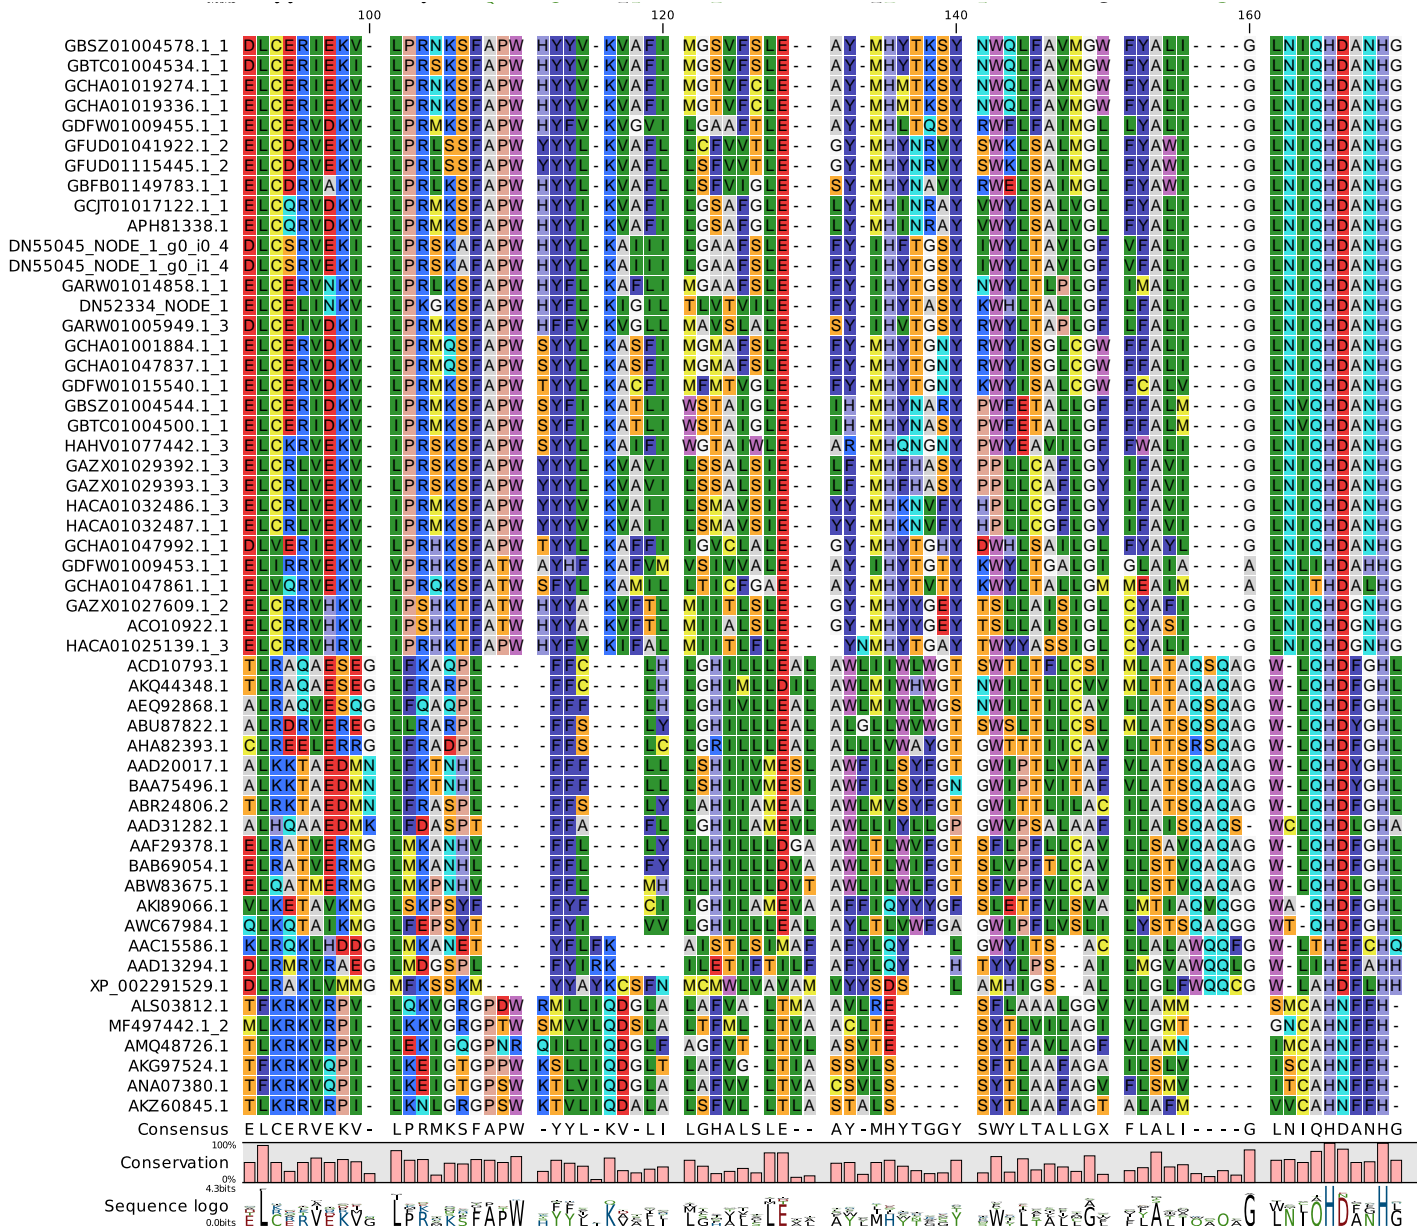

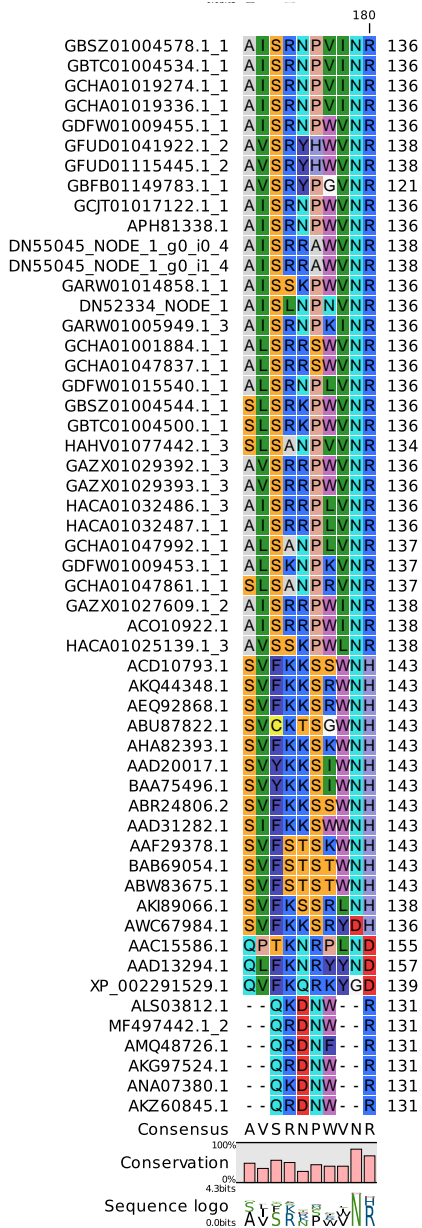

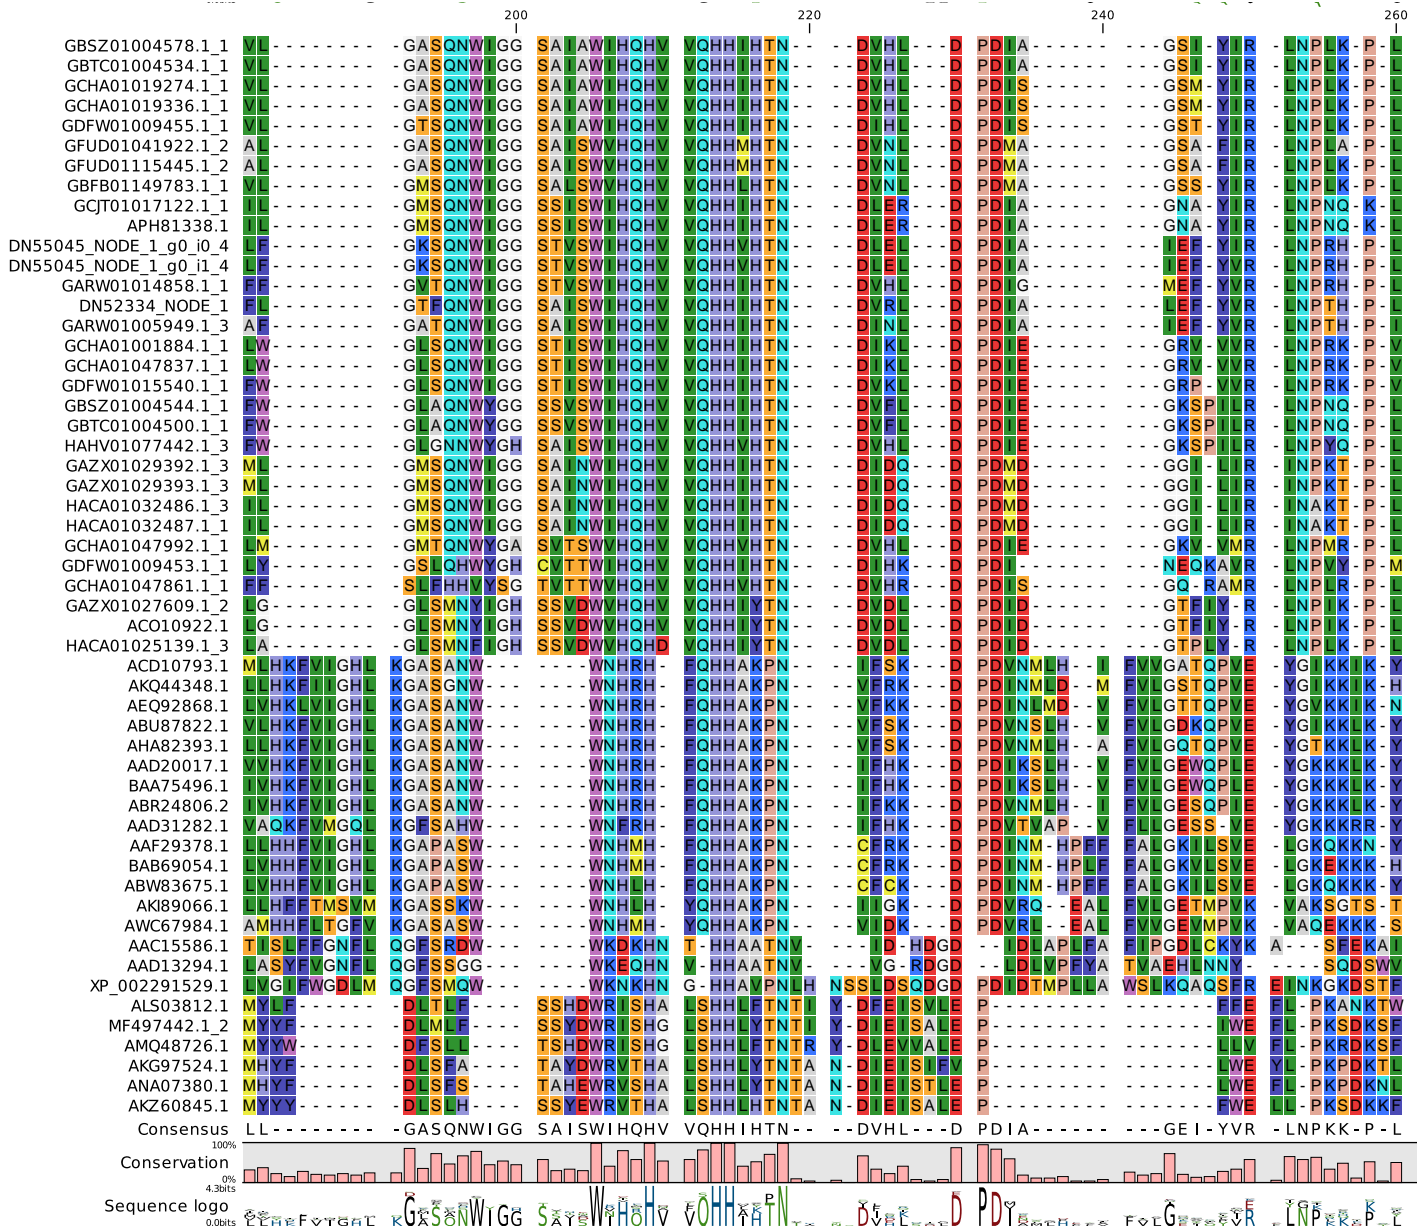

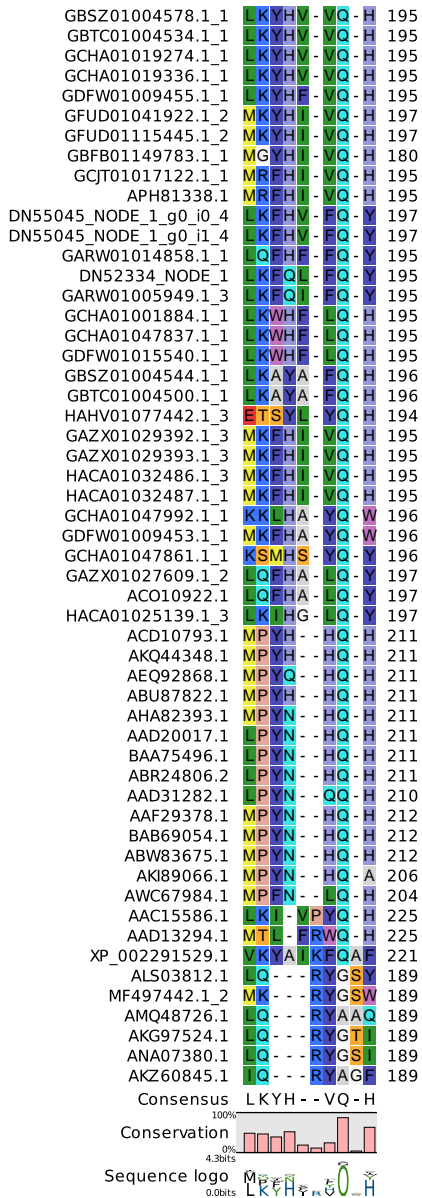

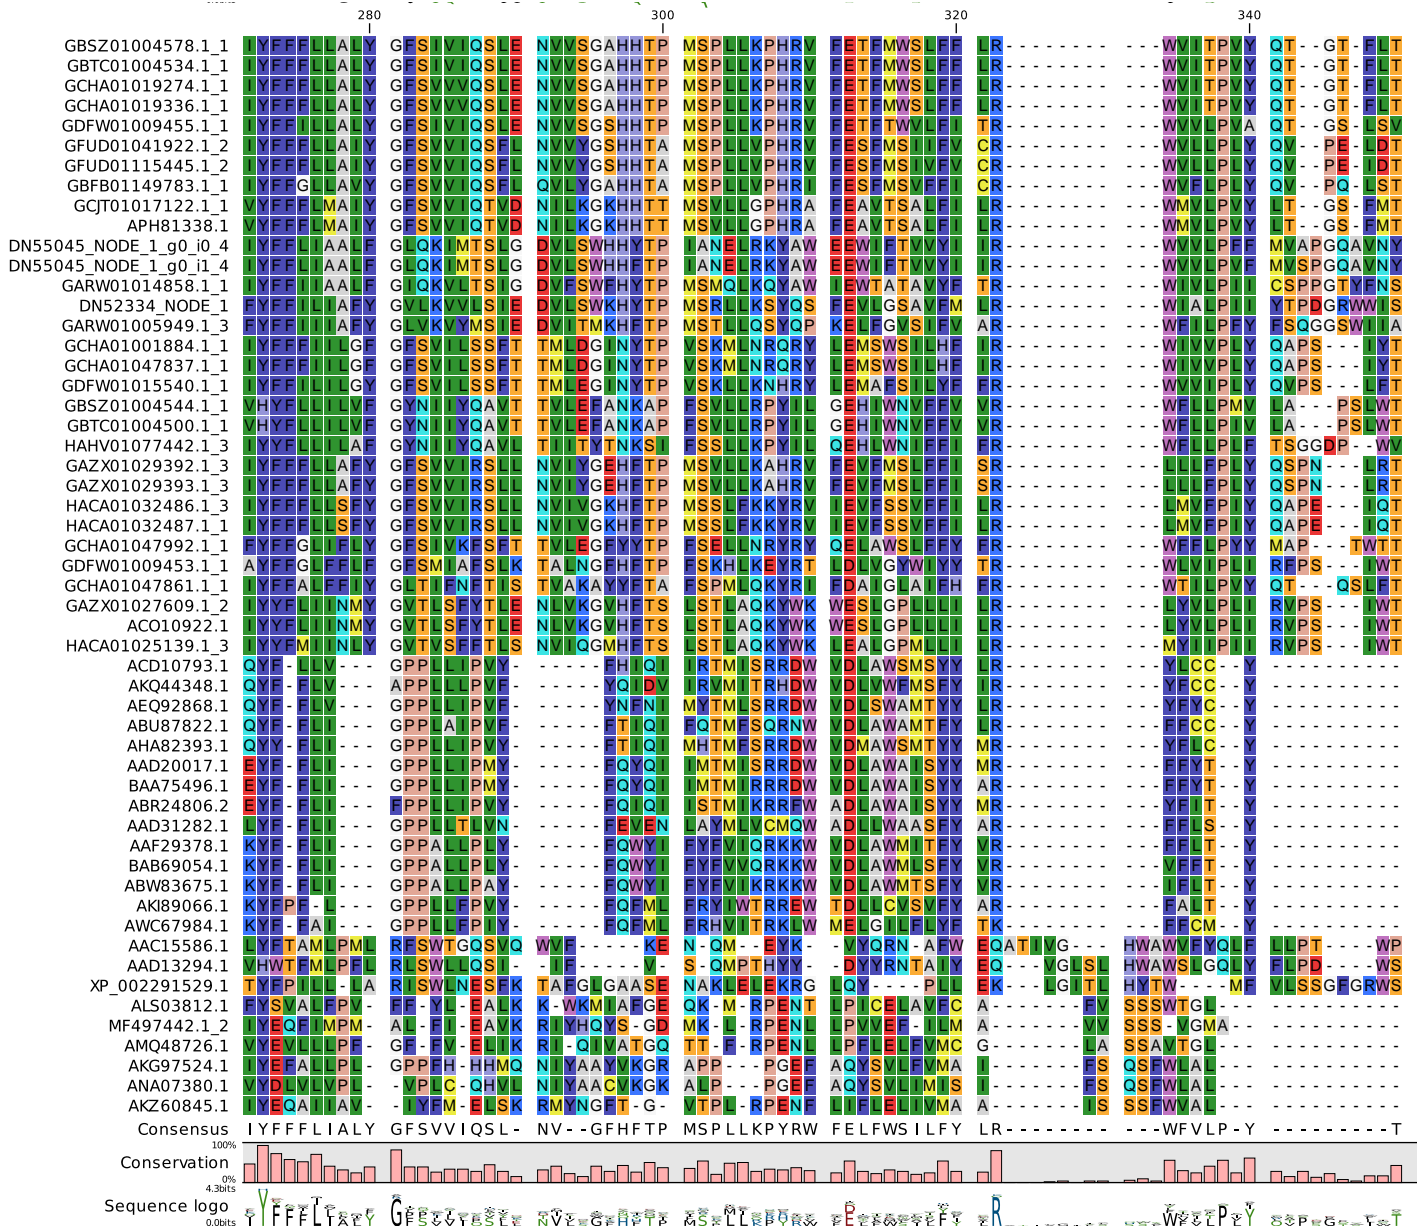



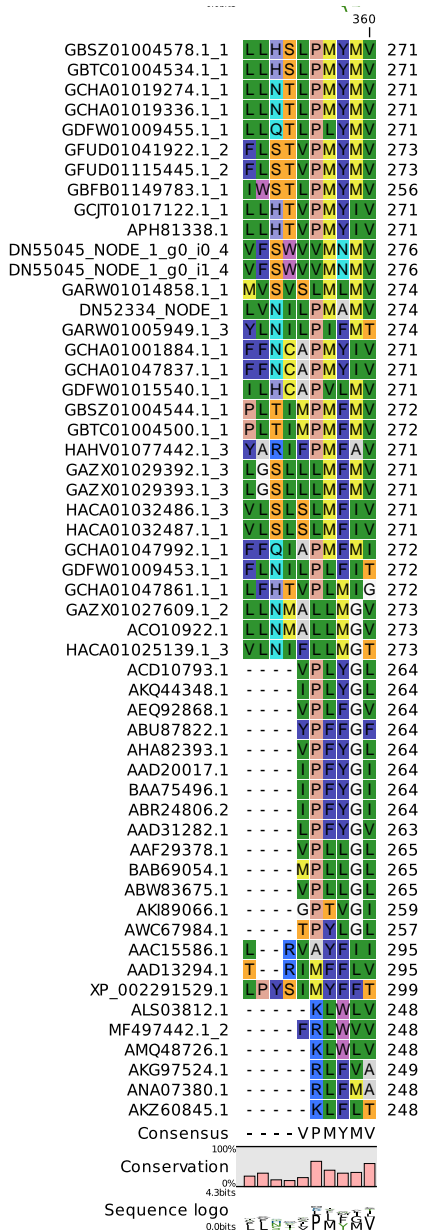

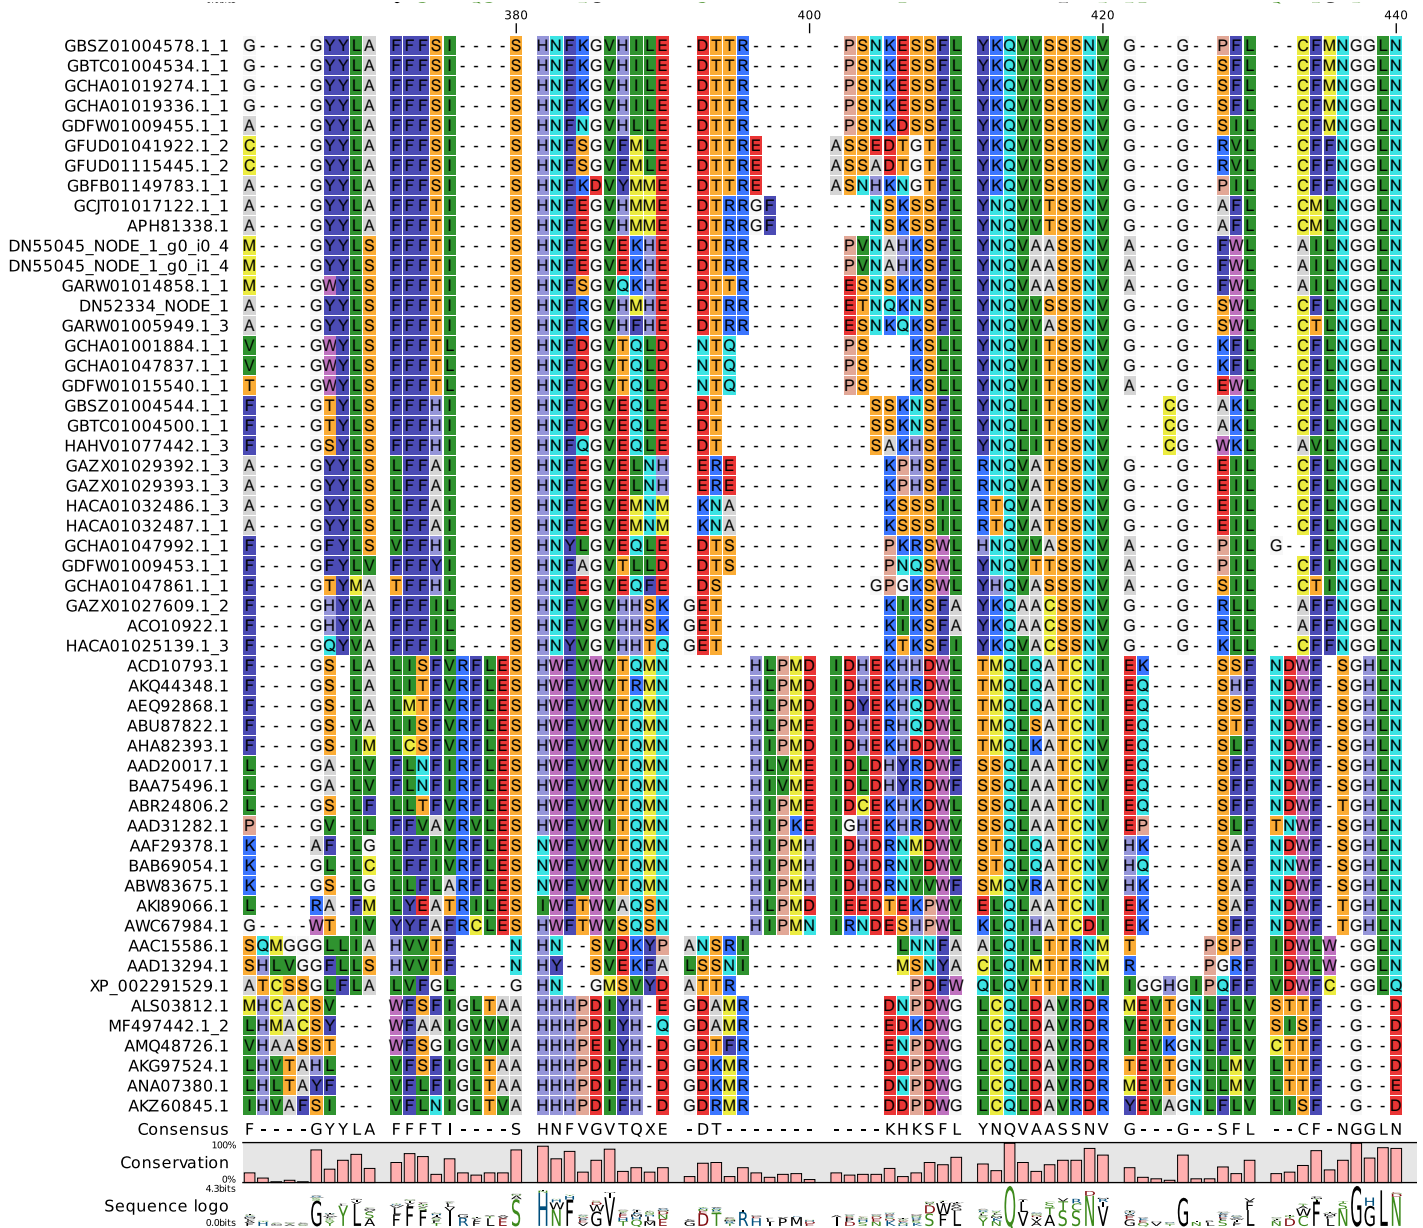

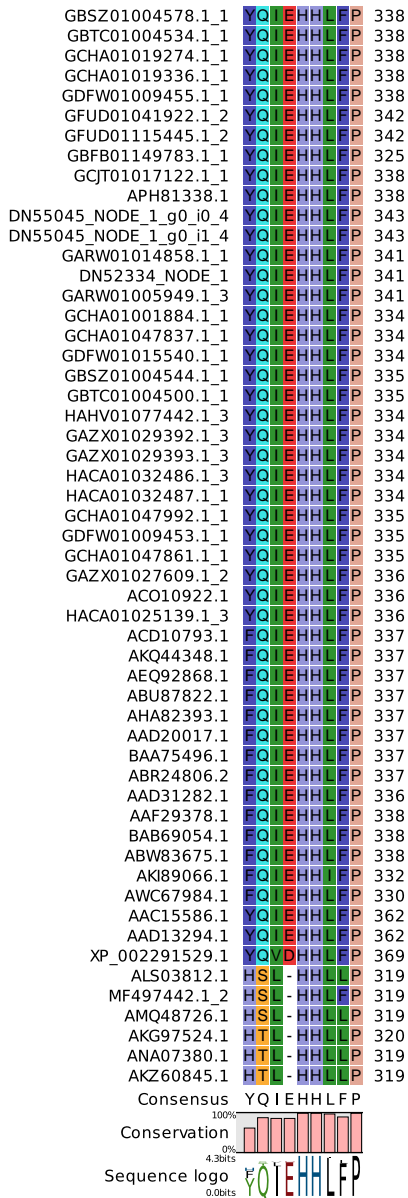

Figure S2. txt overview of identified copepod desaturase genes including AA sequence.

**Table S1. Fasta nt sequence of differently expressed desaturase genes.**

>NODE\_1\_length\_2498\_cov\_171.314227\_g0\_i0

GGGCCTTTTTGCGGTATGGTATGACAGTACGGCAGCAAAGTACAGTAGAATGGACGAC  
CAGATTCTGGGGACAAAATTATTTGGCACAATTGTACTACTTTACCGTACCCGTCTGTGC  
TACCAGGGTTGTACTTTTAAACGCTCCATATTTCTGATGCCGAGAACTCGAATAAATACA  
CAGTAAAAAAACATTTAATTGTCTTACATTGCATTGGATTACTGCAATAAATTGTACTA  
ATGAGACATAATAGAAAAATTAATTCTAAAAGAAAATTGAAGTCAACTGCGCAAGACT  
TGCCATTTTAATCAATATCCTTCTATTCTATTCAATAACTAAGAAATTATTGATGTTGAC  
TAAAAATAGTTGAATATTTAGATTGTTTCTCTTAAAAGTATTTTTTCGAAAATTCG  
AGACTATCCTCTCAAGCCGAGAAGATTCTTTATAGTTTATGAGAACATATTTTTGATTG  
TAATAATTAATGATGCTTCAATCATTGATGATAAAAAATTTCCACCTAACATCATCCATG  
ATTTTCGCAAAGTTTTTTAATGATGCACAAAATTCGCTTCCTTGTCGCTACTCCCAA  
GTGGCGGTCATATTTAAAATTGTGATTGAGCACTTAACCCTGCCAGGGTCATCGAAATC  
CCTATTGCGGCAATGGGTTGACGTCGTAATTCTCAAAGAGCGTTGCTCAAATAAAGTAC  
GCCTCAATAGAGCACCATCTAAACAATAGTGCATTTGGCAGTGACAGTGGGCAGGGTCC  
ATTTAAAAGGTGATATTTGATTTTAAACAAGACAAGTGCATTTTTTCAGAACGCCACC  
TCTTCAGAGTAGTTGAATATACGTACACATACTTGAATTCTTTTCAGGAAGCTGTGTT  
TGTTTTGAACTCGTATTGTATGTTATTTGGCAACGTAGCAATGTAATCTTAAAAAATCT  
TTTTCTTTCATCAATATGTTTTCTCATTCTCAGGTGGAGGGGATTGCACGTCGGGTGGG  
GTGGGGTGTTCAGGGTCGAAGGGCATTATGTGGCTTATGAAACAATGGGCATTTTAGTT  
GCCGCTTCTCATAACAACCGAATTCGGCATCTCACTTTCTCCCATGTCCATGAGGTGC  
TTGATGCACGCACGAAGGTTTTCGTCGATGGTTGTGAAATGGACGTAGGGGATCTTGCGC  
TCATCGCAAATTTCTTAACGTGTGGTTCGATTGTCGGATAATGTGTGTGATTTATCCGA  
GGAAAAAGATGATGTTTCGATCTGGTAATTGAGACCTCCATTTAGAAAACAAAGCCACGAA  
CCACCGACGTTTGAGGAAGAAACAACCTGATTGTAGAGGAAGGAGTTCTTTTGGTTTCGTT

TCTCTTAGTGTCTCGTGCATGTGGACACCTCTAAAGTTGTGGCTGATTGTGAAGAAG  
AAAGACAGGTAATAGCCGGCCACCATAGCCATAGGCAGTATGTTCACTAAGGAGATCCAC  
CACCTTCCGTCCGGCGTGTAGATAATGGGAAGGGCGATCCATCTAAGCATGAAGACTGCT  
GAGCCCAAGACTTCAAAGGATTGGTAGCTTTTAAGAAGACGCGACATCGGAGTGTAAATGT  
TTCCAAGAAAGGACATCCTCAATGGATAGAACAACCTTGAGGACGCCGTAAAACGCGATA  
AGGATGAAAAAATAGAAGTACTGGAATAGTTGAAACTTGAGCAGAGGGTTCGTCGGATTC  
AATCTCACGTAAAACCTGAGAGCAATATCCGGATCGAGCCTGACATCGTTCGTGTGGATG  
TGATGCTGGACAACATGTTGATGGATCCATGAAATGGCACTGCCACCGATCCAGTTCTGG  
AAGGTTCCAAGAAATCGATTACATTCGATTCAAGGAAATTGCTCCGTGATTTGCGTCG  
TGCTGGATGTTCAAACCGATGAGAGCAAATAGGAATCCCAACAAAGCTGTTAGATGCCAT  
TTGTAGGATGCAGTGTAGTGGATGTAAAATCCAAAATGACTGTCACCAAGGTTAAGATT  
CCGATCTTAAGAAAGTAGTGCCACGGAGCAAACGACTTCCCCTTTGGTAAAACCTTATTA  
ATGAGTTCGCATAGTTCGAGGAAGTCTTGATTATCCTTTTCGCTGTAGTCGACAGATTTA  
TCGACAGCATAAAAAGCTTCTTTGGCTCGATTGTGTGGAAAAGTTTGCGATGATACGAC  
AAAAATGCTTGAGATGAATCACGGCCGGCAAATGCCTTGACGAATAAAGTCCACCGGGA  
TGAATTTTAGCCAGTTGCTGAGCAGAATAAAGCTTGTCTTCTACTCGAATCAATTCATCA  
GGAACGCGGCTCGGCATTGTGAGATGAAATATCTAATAGTTGATAGAATGAAAGTAAAT  
GAACTATCCGGTGTTACCGATGCTTTCTTCTGGTACATTTATATACAAAATTTAAAGTT  
TGCGCTGTGTTGTTTTGGAACTGGTTAAAAGTTTC

>NODE\_1\_length\_1925\_cov\_185.031857\_g0\_i0

CGCCGCCAAAACAACCTTTAGTGATGGAGAAAAATTTTAGAAAAATGAGTAAATAACT  
ATACCTCCTTAGTTTTTAGATGACCTGAGAACTATTTCTCATTTTAAAATTGTTCCAAG  
TTAACTTTAATGATTAATAATGAGATCATTGACGGCATCTCTTAATAGGTCTAAGTCAA  
TCAAACATTTATGTAAAAAAAATGCGTGATACTTTAAAAGACATATATTTCTGCATTGAT

ATTGAACTCTGCTAAAAGAGCAATATGCATTTAATCTGTTAACAAGGTGAAATTTTCAT  
TTCTATAAAGGGATACTAATTCTAAATTTGTATCTTGTGATTGATTCGGTTTTTCGTTGC  
CACGTCAAATGACGCTTTCTGTCTGTTTTATAATTCCACAAACCATAAGATTTTGGGAGT  
TTAAGAAACGATATGCATTTTTGCAGAACTTTTTCGGAGGGGTTGACGAAGCCTTCGAT  
GTTGAAGTTCTTGTGCTGCCCATTTCCGCCAGATGTTGCACCAAGGCTCTCACGTTTTG  
TGGAACGGACTCGAAGTGCGTGTACGGAATCTTTCGCTCCTCGCAGAACTGCCTCACTAC  
GGGCGCGATGTAATAGTAGTGAGTGTGATTGATCCTCGGGAACAGGTGGTGTTCGATTTG  
GTAGTTGAGGCCGCCGTTCCAGGATTGCCAGCCAGAATCCAGCGACATTGGATGAAGCGGC  
AACCTGGTTGTATAGGAAAGACTTGTGTGCGTTGACTGGTCTTCTCGTGTCTTCATGCTT  
TTCGACACCTTCAAAGTTGTGGCTGATCGTGAAGAAGAAAGACAGGTAGTAGCCCATCAC  
CATGTTTCATCACCACCCAGCTGAAGACGTAGTTAACGGCCTGCCAGGTGCAACCATGAA  
GAAGGGCAAGACGACCCACCTGATGATGTAGACAACGGTGAAAATCCATTCCTCCCAAGC  
GTACTIONGTAACCTCGTTGGCGATCGGAGTATAGTGGTGCCAACTGAGGACATCGCCGAG  
ACTCGTCATGATTTTTTGAATCCGAAAAGAGCAGCAATGAGGAAGAAATAAATGTACTIONG  
AAAGACATGAAACTTCAGCAGAGGATGTCTAGGGTTCAGTCGAATGTAATAACTCGATGGC  
AATGTCGGGATCGAGCTCGAGATCGTTGGTGTGAACGTGGTGTGAACGACATGTTGGTG  
AATCCATGAGACAGTGCTACCCCCGATCCAATTTTGAGATTTTCAAAGAGTCGATTGAC  
CCATGCCCTTCTCGAAATTGCGCCATGGTTGGCATCGTGCTGAATATTTAAACCAATTAA  
AGCGAAGACGAACCCAAGGACTGCAGTCAGATACCAAATGTAGGAGCCGGTGAAGTGGAT  
GTAAACTCGAGTGAGAATGCAGCTCCAAGGATGATGATCGCCTTCAGGTAGTAGTGCCA  
CGGAGCAAAGCCTTTGACCGCGGAAGTATCTTCTCGACTCTACTGCATAGGTCCAAAAA  
GTCATCGTTGTCCTTTGTGGTGTACTTAATACTTTTGTCTTGTAAAGAGGAAAGATTCTTT  
TGCAGGCTTGCTGCCATGAGGAAAATTTCTTCTGTGGTAGGAAAGGAATGCCTGAGAGGC  
GTCTCGACCCGAAAATGCCTTAATGAAGACCGGTCCACCTGGGTGAAGCTTGGACAACCTT

CTCAGCGGAGTAGACTTTGTCCTCTATTCGGATCTGACCCTCGGGGACTTCAGACATGTT  
AATACAATCTTTTCTTATCCTGAAGCCCTGAACTCCGAGAAAAGTATTCTGATTTTC  
TGACTTGGAACCTTTCGCGCAGACAGATTTTCTCAGACAGCGGCAATGCAAAAATCGCACG  
ATCGGCGGAGAACTGTTTAAAATACTTTAAAGAACACAAAAAGCTCGATCATTTCAGTAA  
AAAAT

>NODE\_2\_length\_1925\_cov\_171.963823\_g0\_i1

CGCCGCCAAAACAACCTTTAGTGATGGAGAAAAATTTTAGAAAAATGAGTAAAATAACT  
ATACCTCCTTAGTTTTTATGATGACCTGAGAAGTATTTCTCATTTTAAAATTGTTCCAAG  
TTAACTTTTAAATGATTAATAATGAGATCATTGACGGCATCTCTTAAATAGGTCTAAGTCAA  
TCAAACATTTATGTAAAAAAAATGCGTGATACTTTAAAAGACATATATTTCTGCATTGAT  
ATTCGAACTCTGCTAAAAGAGCAATATGCATTTAATCTGTTAACAAGGTGAAATTTTCAT  
TTCTATAAAGGGATACTAATTCTAAATTTGTATCTTGTGATTGATTCGGTTTTCGTTGC  
CACGTCAAATGACGCTTTCTGTCTGTTTTATAATTCCACAAACCATAAGATTTTGGGAGT  
TTAAGAAACGATATGCATTTTGCAGAACTTTTTCGGAGGGGTTGACGAAGCCTTCGAT  
GTTGAAGTTCTTGTGCTGCCATTTCCGCCAGATGTTGCACCAAGGCTCTCACGTTTTG  
TGGAACGGACTCGAAGTGCGTGTACGGAATCTTCGCTCCTCGCAGAACTGCCTCACTAC  
GGGCGCGATGTAATAGTAGTGAGTGTGATTGATCCTCGGGAACAGGTGGTGTTCGATTTG  
GTAGTTGAGGCCCGCCTTCAGGATTGCCAGCCAGAATCCAGCGACATTGGATGAAGCGGC  
AACCTGGTTGTATAGGAAAGACTTGTGTGCGTTGACTGGTCTTCTCGTGTCTTCATGCTT  
TTCGACACCTTCAAAGTTGTGGCTGATCGTGAAGAAGAAAGACAGGTAGTAGCCCATCAC  
CATGTTTCATCACCACCCAGCTGAAGACGTAGTTAACGGCCTGCCAGGTGAAACCATGAA  
GACGGGCAAGACGACCCACCTGATGATGTAGACAACGGTGAAAATCCATTCCTCCAGGC  
GTACTTACGTAGCTCGTTGGCGATCGGGGTAAAGTGGTGCCAACTGAGGACATCGCCGAG  
ACTCGTCATGATTTTTTGTAAATCCGAAAAGAGCAGCGATGAGGAAAAAATAAATGTACTG

AAAGACATGAACTTCAGCAGCGGATGTCTAGGGTTGAGTCGGACGTAAAACCTCGATGGC  
AATGTCCGGATCGAGCTCAAGATCGTTGGTGTGAACGTGGTGTGAACGACATGTTGGTG  
AATCCATGAGACAGTGCTTCTCCGATCCAATTTTGAGATTTTCAAAGAGTCGATTGAC  
CCATGCCCTTCTCGATATTGCGCCATGGTTGGCATCGTGCTGAATATTTAAACCAATTA  
AGCGAAGACAAACCAAGGACTGCAGTCAGGTACCAAATGTAGGAGCCGGTGTAGTGGAT  
GTAAAACCTCGAGTGAGAATGCAGCTCCAAGGATGATGATCGCCTTCAGGTAGTAGTGCCA  
CGGAGCAAAGCCTTTGACCGCGGAAGTATCTTCTCGACTCTACTGCATAGGTCCAAAAA  
GTCATCGTTGCCTTTGTGGTGTACTTAATACTTTTGTCTTGTAAGAGGAAAGATTCTTT  
TGCAGGCTTGCTGCCATGAGGAAAATTTCTTCTGTGGTAGGAAAGGAATGCCTGAGAGGC  
GTCTCGACCCGAAAATGCCTTAATGAAGACCGGTCCACCTGGGTGAAGCTTGGACAACCT  
CTCAGCGGAGTAGACTTTGCCTCTATTCGGATCTGACCCTCGGGGACTTCAGACATGTT  
AATACAATCTTTTCTTATCCTGAAGCCCTGAACTCCGAGAAAACCTGTTATTCTGATTTTC  
TGACTTGGAACCTTTGCGGCAGACAGATTTTCTCAGACAGCGGCAATGCAAAAATCGCACG  
ATCGGCGAGAAGCTGTTTAAATACTTTAAAGAACACAAAAAGCTCGATCATTGCGAGTAA  
AAAAT



**Table S2. Datasets used for FA desaturase and elongase identification.**

| <b>Accession number</b> | <b>Data type</b> | <b>Species</b>                 |
|-------------------------|------------------|--------------------------------|
| GHAJ01                  | TSA              | <i>Apocyclops royi</i>         |
| GFWY01                  | TSA              | <i>Acartia tonsa</i>           |
| HAGX01                  | TSA              | <i>Acartia tonsa</i>           |
| GAXK01                  | TSA              | <i>Calanus finmarchicus</i>    |
| GBFB01                  | TSA              | <i>Calanus finmarchicus</i>    |
| GBXU01                  | TSA              | <i>Calanus finmarchicus</i>    |
| GBXT01                  | TSA              | <i>Calanus glacialis</i>       |
| HACJ01                  | TSA              | <i>Calanus glacialis</i>       |
| GAZX01                  | TSA              | <i>Caligus rogercresseyi</i>   |
| GFUA01                  | TSA              | <i>Epischura baikalensis</i>   |
| GARW01                  | TSA              | <i>Eucyclops serrulatus</i>    |
| GBGO01                  | TSA              | <i>Eurytemora affinis</i>      |
| GEAN01                  | TSA              | <i>Eurytemora affinis</i>      |
| GFWO01                  | TSA              | <i>Labidocera madurae</i>      |
| HACA01                  | TSA              | <i>Lepeophtheirus salmonis</i> |
| GFUD01                  | TSA              | <i>Neocalanus flemingeri</i>   |
| GCJT01                  | TSA              | <i>Paracyclops nana</i>        |
| GFCI01                  | TSA              | <i>Pleuromamma xiphias</i>     |
| GBSZ01                  | TSA              | <i>Tigriopus californicus</i>  |
| GBTC01                  | TSA              | <i>Tigriopus californicus</i>  |
| GCHA01                  | TSA              | <i>Tigriopus japonicus</i>     |
| GDFW01                  | TSA              | <i>Tigriopus sp.</i>           |
| HAHV01                  | TSA              | <i>Tisbe holothuriae</i>       |

**Table S3. CLC alignment of all identified sequences with database versions.**

```

#Accession_number_Species_and_identifier_Reading_frame_Direction_AA_sequence_of_transcript
>GARW01005949.1_Eucyclops_serrulatus_Eucyclops_serrulatus_contig_5326_1_3_forward
A*VKRTFQYKFTGFQSSSHCQKMPDAVKDGFIRVEDKVYDAEKLADFPGGPLFVKAFSGRDASQAFLSYHRRQFPHSRAKEA
FHSDDKSVNYKEADNKDFLDLCEIVDKILPRMKSFAPWHFFVKVGLLMAVSLALESYIHVTGSYRWYLTAPLGFALIGLNIQHD
ANHGAISRPNKINRAFGATQNWIGGSAISWIHQHVQHHIHTNDINLDPDIAIEFYVRLNPTHPILKFQIFQYFYFFIIAFYGLVKV
YMSIEDVITMKHFTPMSTLLQSYQPKELFGVSIFVARWFILPFYFSQGGSWIIAYLNILPIFMTAGYYLSFFFTISHNFRGVVHFHEDT
RRESNKQKSFLYNQVWASSNVGGSWLCTLNGLNYQIEHHLFPRINHHTHYPTIAPHVRKFCEDRNIPYVHFPTIGDNLKACIKHL
MDMGNNEQPQTIVFEKTSAKIHLSS*IKGYIYVILTKLDM*VYVYVGLQKELNMIVFKL*GVFLTPLYVF*KS*QTIKLTSSISLYFGN
RINLLDSF*SIYLLFKWVLINFEIYGY*ISKCVFLITRL*KYCSSFVILLKNYFYISIFRKRFFPKPKILYSRISPPPPYFINNCQFNLQISY
GII*LKYHFVDSSFFKYHFCQIMLY**ILL*LFNAIFCIK*NAQILLSFINQCKRYKDIAPRT*Y*VFVNGFRKYCIAPY*VVNKVINRK
K
>GARW01014858.1_Eucyclops_serrulatus_Eucyclops_serrulatus_contig_12979_1_1_reverse
EKLA KMHPGGPMFIHAFSGRDASQAFMSYHRRQFPHSRAAEAFEKVDENVNYTTKDNEDFAELCERNKVLPRLKSFAPWHY
FLKAFLIMGAASFLEFYIHYTGSYNWYLTLPFGIFMALIGLNIQHDANHGAISSKPWVNRFFGVTQNWIGGSTVSWIHQHVQVQ
HIHTNDVHLDPDIGMEFYVRLNPRHPLLQFHHFYIYFFIIAALFGIQKVLTSIGDVFSWFHYTPMSMQLKQYAWIEWTATAVYF
TRWIVLPIICSPPGTYFNMSVSVLMLMVMGWYLSFFFTISHNFSGVQKHEDTTRESNSKKSFLYNQVAASSNVAGFWLAILNG
GLNYQIEHHLFPRINHHTHYHTIAPVVREFCEEKQIPYTHFPTVGANVDALIQHLFDLGNENLNDLLHDPSAKSSARMPLIS*KSK
HLEPSMLFTIIVSI*KPFSCLCY*SNFSLYVHS*KK*YSYSLTPTFTCTNYATNKQSLSHQLN*VFFKKNLDFHYGFKKE*GGE*
NCLGIRSP*FYLS**CCLKV*SLN*N*SKILVFRKLAYVYNHFI*T*FSNILISFLFYNSKNYNSGKX
>GAZX01027609.1_Caligus_rogercresseyi_tsa-crog-ngs-11111315_2_forward
DNVRT*RLHAQPLENLHRLSK**IVPVNPSEARNMPPSITKTESIHEASSASFIRSQLEPKPIGDTSLQVENRIYDAQELAKFHP
GGELFVKAFAGRDATLAFLSYHRKFKPHNRVSALETVDPTVRDQDVREVEDDYELCRRVHKVIPSHKTFATWHYYAKVFTLMI
ITLSLEGYMHYYGEYTSLLAISIGLCYAFIQLNIQHDGNHGAISRRPWINRLGGLSMNYIGHSSVDWVHQHVQHHIYTNDVDLD
PDIDGTFIYRLNPIKPLLQFHALQYIYFLIINMYGVTLFSYTLLENLVKGVHFTSLSTLAQKYWKWESLGPLLLILRLYVPLIRVPSIW
TLLNMALLMGVFGHYVAFFLILSHNFVGVVHHSKGETKIKSFAYKQAACSSNVGGRLAFFNGGLNYQIEHHLFPRMCHIHYPV
APIVRAFCEEKSIPYHHFPTITENFVSTA EHL LSLGTEENPESLKFL*RNNNL*YLHKF*IKSRSFVFMFL*S*AIKI*RKFIYKYL*NSV
S*IS*IIVLNVLQHIYYYYYY*KHSLTR*AFNVIEKERKKS*GLKIM*CYVVVWHSFLCVCRYISLFLRRKSPDF*ICCPLEANNEYDE
QANEKEE*DTDT*NNESYFYSIQS*FISLWTQGEVVFISEAVSYA**NRICFAAAAC*CELDYLLRVSSDVRLMAKFQGGSVRAD
KGVCFHGANARFFVLNMANDSPCL**TVLNF*ALIHD*G*RITNLRFD*VIECVTHVEGYFYFKSLDFRCDNPIGIQGYCFDFDHT
SMPIRYPLRDPQIKCKDFSPFPRNSQSRRACTFQKP*NPPGVLSHFHVKYPFSRVQIS*PNPNIGSHSPRSNQATAFFKFKPHGV
RTSNL*ARGWSSRQDRIS*EDPGGWTYDIRHSGHNMVD**X
>GAZX01029392.1_Caligus_rogercresseyi_tsa-crog-ngs-11113104_3_reverse
RD**IYK*IDRIALQ*RH*VVTLPYVCFIVQTLTYRP*LYRPCYFFISIKVVSQPFITLKLHKPKLLGLFGSDMLI*FLVMVVAGDEIL
VEGKTYSAQDLAEIHPGGRLVQAFSGLDASVAFLSYHRRKFPHSRAKTALKAEGNDTNNPEGWDDEYLELCRLVEKVLPRSKSF
APWYYYLKVAVILSSALSIELFMHFHASYPPLCAFLGYIFAVIQLNIQHDANHGAVSRRPWVNRMLGMSQNWIGGSAINWIH
QHVVQHHIHTNDIDQDPDMDGGILIRINPKTPLMKFHIVQHIYFFLLAFYGFVSVIRLLNVIYGEHFTPMSVLLKAHRVFEVFM
SLFFISRLLLPLYQSPNLRTLGSLLMFMVAGYLSLFFAISHNFEGVELNHEREKPHSFLRNQVATSSNVGGEILCFLNGLNYQI
EHHLFPRISHCHYPKIAPVVKEFCQARNIPYVHFPSVLDNVNNSIRHLIFMGGASEPFPKLSAQRATTQLQS*RTPH*L*A*VFICR
DILTSSHLK*IKPLYKICHLVINRDIQK**DSPDRLSYPAKTKEKTCENNGYI**EAPPTLHLFFFCFNGFQIMLIT*KMINFPALFK
NFEQLA**FFKFQLKLPY*TRARKEERGFHRFRVLFIGSSL*CKSCSPWAFKTSQKTTLMMPNRPLTSLV

```

>GAZX01029393.1\_Caligus\_rogercresseyi\_tsa-crog-ngs-11113105\_3\_reverse  
SSPHNWLLPTCFSSSM\*LLSYD\*AIPFFDYMSAFFLLLDMSV\*FLVMTVAGDEILVEGKTYSAQDLAEMHPGGRLFVQAFSGLD  
ASAAFLSYHRRKFPHSRAKTALKAEGNDTNNPEGWDDEYLELCRLVEKVLPRSKSFAPWYVYLVAVILSSALSIELFMHFHASYP  
PLLCAFLGYIFAVIGLNIQHDANHGAVSRRPWVNRMLGMSQNWIGGSAINWIHQHVQHHIHTNDIDQDPDMDGGILIRINP  
KTPLMKFHIVQHIYFFFLAFYGFSSVIRSLNVIYGEHFTPM SVLLKAHRVFEVFM SLFFISRLLLFPLYQSPNLR TLGSLLLMFMV  
AGYLSLFFAISHNFEGVELNHEREKPHSFLRNQVATSSNVGGEILCFLNGGLNYQIEHHLFPRISHCHYPKIAPVVKEFCQARNIP  
YVHFPSVLDNVNSSIRHLIFMGGASEPFPKLSAQLRATTKLQS\*RTPH\*L\*A\*VFICRDILTSSHLK\*IKPLYKICHLVCVINRDIQK\*\*  
DSPDRLSYPAKTKKTCENNGYI\*\*EAPPTLHFFFCFNGFQIMLIT\*KMINFPALFKNFEQRLA\*\*FFKFQLKKLPPY\*TRARKEE  
RGFHRFRVLFIGSSL\*CKSCSPWAFKTSQKTTLMMPNRPLTSLV

>GBFB01149783.1\_Calanus\_finmarchicus\_comp270289\_c0\_seq6\_1\_reverse  
QAFLTYHRRQFPHTSDIAKA AFEEVDDTVKYTKDDNQDFMELCDRVAKVLPRLKSFAPWHYYLKVAFLLSFVIGLESYMHYNAV  
YRWELSAIMGLFYAWIGLNIQHDANHGAVSRYPGVNRVLGMSQNWIGGSALSWSVHQQHVQHHLHTNDVNLDPDMAGSSY  
IRLNPLKPLMGYHIVQHIYFFGLLAVYGFSSVVIQSFLQVLYGAHTAMSPLLVPHRIFESFMSVFFICRWVFLPLYQVPQLSTIWS  
LPMYMVAGYYLAFFFSISHNFKDVYMMEDTTREASNHNKNGTFLYKQVSSSNVGGPILCFNGLNYQIEHHLFPRISHCHYPI  
APIVREYCKEKSIPYVHFDTIAENIRSCALHLLDLGSHQTPKNVHFIQKEKSQ\*INTIYIKKTX

>GBSZ01004544.1\_Tigriopus\_californicus\_SD\_As4\_Contig22385\_1\_forward  
MSATKLAADQILVEGKVYSSTKLADLHPGGPLFLRAFSGRDATQAFSLYHRRTFPHSRVKEAFEHHHPDVVYDPATNADYLELCE  
RIDKVIPRMKSFAPWSYFIKATLIWSTAIGLEIHMHYNARYPWFETALLGFFFALMGLNVQHDANHGSLSRKPWVNRFWGLAQ  
NWXGSSVSWIHQHVQHHIHTNDVFLDPDIEGKSPILRLNPNQPLLKAYAFQHVHYFLLILVFGYNIYQAVTTVLEFANKAPF  
SVLLRPYILGEHIWNVFFVVRWFLLPMLVAPSLWPTLTPMFMVFGTYLSFFFHISHNFDGVEQLEDTSSKNSFLYNQLITSSN  
VCGAKLCFLNGGLNYQIEHHLFPRMHHSHYPTVAPHVRNFCEEKGLPYHHFPTIRENLSSCINHLSDFGRK

>GBSZ01004578.1\_Tigriopus\_californicus\_SD\_As4\_Contig8388\_1\_forward  
LADLHPGGPLFIKAFSGRDASQAFLTYHRRQFPHQRVKEAFESTDETVTYSTDDHADFIDLCEKIEKVLPRNKSFAPWHYVYKVA  
FIMGSVFSLEAYMHYTKSYNWQLFAVMGWYFALIGLNIQHDANHGAI SRNPVINRVLGASQNWIGGSAIAWIHQHVQHHI  
HTNDVHLDPDIAHSIYIRLNPLKPLLKYHVQHIYFFFLALYGFSSVVIQSLENNVSGAHTPMSPLLKPHRVFETFMWSLFFLRWV  
ITPVYQTGTFTLLHSLPMYVGGYYLAFFFSISHNFKGVHILEDTRPSNKESFLYKQVSSSNVGGPFLCFMNGGLNYQIEHH  
LFPRISHTHYPKIAPT VKAFCKEKNIPYVHFPTIGENIRSCTQHLWDMGNETPKNATIQA AKTLLVN

>GBTC01004500.1\_Tigriopus\_californicus\_SCN\_Contig\_30034\_1\_forward  
MSAPKLAADQILVEGKVYSSTKLADLHPGGPLFLRAFSGRDATQAFSLYHRRTFPHSRVKEAFEHHHPDVVYDPATNADYLELCE  
RIDKVIPRMKSFAPWSYFIKATLIWSTAIGLEIHMHYNASYPWFETALLGFFFALMGLNVQHDANHGSLSRKPWVNRFWGLAQ  
NWXGSSVSWIHQHVQHHIHTNDVFLDPDIEGKSPILRLNPNQPLLKAYAFQHVHYFLLILVFGYNIYQAVTTVLEFANKAPF  
SVLLRPYILGEHIWNVFFVVRWFLLPIVLAPSLWPTLTPMFMVFGTYLSFFFHISHNFDGVEQLEDTSSKNSFLYNQLITSSNVC  
GAKLCFLNGGLNYQIEHHLFPRMHHSHYPTVAPHVRNFCEEKGLPYHHFPTIRENLSSCINHLSDFGRK

>GBTC01004534.1\_Tigriopus\_californicus\_SCN\_Contig\_11004\_1\_forward  
LADLHPGGPLFIKAFSGRDASQAFLTYHRRQFPHQRVKEAFESTDETVTYSTDDHADFIDLCEKILPRSKSFAPWHYVYKVAFI  
MGSVFSLEAYMHYTKSYNWQLFAVMGWYFALIGLNIQHDANHGAI SRNPVINRVLGASQNWIGGSAIAWIHQHVQHHIHT  
NDVHLDPDIAHSIYIRLNPLKPLLKYHVQHIYFFFLALYGFSSVVIQSLENNVSGAHTPMSPLLKPHRVFETFMWSLFFLRWVIT  
PVYQTGTFTLLHSLPMYVGGYYLAFFFSISHNFKGVHILEDTRPSNKESFLYKQVSSSNVGGPFLCFMNGGLNYQIEHHLF  
PRISHTHYPKIAPT VKAFCKEKNIPYVHFPTIGENIRSCTQHLWDMGNETPKNATIQA AKTLLVN

>GCHA01001884.1\_Tigriopus\_japonicus\_TJ\_CDS\_01884\_1\_forward

ACFVLTFCWRTDLSFLGLLSDKATCEGFSVTSYRILEMAPNATSQDALVAETAEDCFSGGHLPIGDESIRVEDKIYSAKTLANMH  
PGGPLFIKSFAGRASQAFLSYHRRQFPHSRVKEALEKVDPNVKVDPHAQDDFLELCERVDKVLPRMQSFAPWSYLLKASFIMG  
MAFSLEFYMHYTGNYRWYISGLCGWFFALIGLNIQHDANHGALSRRSWSVNRLWGLSQNWIGGSTISWIHQHVQHHIHTND  
IKLDPDIEGRVVRLNPRKPVFLKWHFLQHIYFFFILGFGFSVILSSFTTMLDGINYTPVSKMLNRQRYLEMSWSILHFIRWIVVPLY  
QAPSIYTFNCAPMYIVVGWYLSFFFTLSHNFDFGVTQLDNTQPSKSLYNQVITSSNVGGKFLCFLNGGLNYQIEHHLFPRMHH  
GHYPKIAPVVKQFCAEKIPYQHFPVTSSNAWACAKHLEMGTDVPSAKHLVTS\*

>GCHA01019274.1\_Tigriopus\_japonicus\_TJ\_CDS\_19276\_1\_forward

MAPNSEIHPESIRVEDRIYSAKLAEFHPPGGPLFIKAFSGRDASQAFLTYHRRQFPHQRAQEAERVDQTVTYSTDDHADFIELCE  
RIEKVLPRNKSFAPWHYVVKVAFIMGTVFCLEAYMHMTKSYNWQLFAVMGWYFALIGLNIQHDANHGAI SRNPVINRVLGAS  
QNWIGGSAIAWIHQHVQHHIHTNDVHLDPDISGSMYIRLNPLKPLLKYHVQVQHIYFFFLLALYGFSSVVQSLNENNVSGAHTP  
MSPLLKPHRVFETFMWSLFFLRWVITPVYQTGTFTLLNLTLPMYMVGYYLAFSSISHNFKGVHILEDTRPSNKESFLYKQVV  
SSSNVGGSLFCFMNGGLNYQIEHHLFPRINHTHYPKIAPTVAFCLEKKIPYVHFPTIGENIRSCTQHLWDMGSHETPKNATIQA  
AKAMLAH\*

>GCHA01019336.1\_Tigriopus\_japonicus\_TJ\_CDS\_19338\_1\_forward

MAPNSEIHPESIRVEDRIYSAKLAEFHPPGGPLFIKAFSGRDASQAFLTYHRRQFPHQRAQEAERVDQTVTYSTDDHADFIELCE  
RIEKVLPRNKSFAPWHYVVKVAFIMGTVFCLEAYMHMTKSYNWQLFAVMGWYFALIGLNIQHDANHGAI SRNPVINRVLGAS  
QNWIGGSAIAWIHQHVQHHIHTNDVHLDPDISGSMYIRLNPLKPLLKYHVQVQHIYFFFLLALYGFSSVVQSLNENNVSGAHTP  
MSPLLKPHRVFETFMWSLFFLRWVITPVYQTGTFTLLNLTLPMYMVGYYLAFSSISHNFKGVHILEDTRPSNKESFLYKQVV  
SSSNVGGSLFCFMNGGLNYQIEHHLFPRINHTHYPKIAPTVAFCLEKKIPYVHFPTIGENIRSCTQHLWDMGSHETPKNATIQA  
AKAMLAH\*

>GCHA01047837.1\_Tigriopus\_japonicus\_TJ\_CDS\_47840\_1\_forward

MAPNATSQDALVAETAEDCFSGGHLPIGDESIRVEDKIYSAKTLANMHPPGGPLFIKSFAGRASQAFLSYHRRQFPHSRVKEALE  
KVDPNVKVDPHAQDDFLELCERVDKVLPRMQSFAPWSYLLKASFIMGMAFSLEFYMHYTGNYRWYISGLCGWFFALIGLNIQ  
HDANHGALSRRSWSVNRLWGLSQNWIGGSTISWIHQHVQHHIHTNDIKLDPDIEGRVVRLNPRKPVFLKWHFLQHIYFFFIL  
GFGFSVILSSFTTMLDGINYTPVSKMLNRQRYLEMSWSILHFIRWIVVPLYQAPSIYTFNCAPMYIVVGWYLSFFFTLSHNFDFG  
TQLDNTQPSKSLYNQVITSSNVGGKFLCFLNGGLNYQIEHHLFPRMHHGHYPKIAPVVKQFCAEKIPYQHFPVTSSNAWACA  
KHLEMGTDVPSAKHLVTS\*

>GCHA01047861.1\_Tigriopus\_japonicus\_TJ\_CDS\_47864\_1\_forward

MPDVGVKSDTVEKLPWDHIRIGNKSYDAKKLSGFHPGGPLFISAFAGRASQAFVSYHRKPFPHQKVKFALEKEDPNIPLDPH  
LNDDFFELVQRVEKVLPRQKSFATWSFYLKAMILLTICFGAEAYMHYTVTYKWYLTALLGMMEAIMALNITHDALHGSLSANPR  
VNRFFSLFHVYSGTVTWWVHQHVQHHVHTNDVHRDPDISGQRAMRLNPLRPLKSMHSYQYIYFFALFFIYGLTIFNFTISTV  
AKAYYFTAFSPMLQKYRIFDAIGLAIFHFRWTILPVYQTQSLFTLFTVPLMIGFGTYMATFFHISHNFEGVEQFEDSGPGKSWLY  
HQVASSNVAGSILCTINGGLNYQIEHHLFPRVYHGHYPTIPIVRQFCEERSIPYRHFPRTLTDNMASTVKHMYDFGVNKVPDAA  
KNLKGLGTQSAMGVPLSG\*

>GCHA01047992.1\_Tigriopus\_japonicus\_TJ\_CDS\_47995\_1\_forward

MSGSESNMTKERRVGSDFVASSLTREKVDVMMDCPANQVRIGNKFYNAEKLLDFHPPGGQLFISAFAGRASQAFMSYHRKRF  
PHQKMKFALDNEDTLAPKEDPHLNDYFDLVERIEKVLPRHKSFAPWYTYLKAFFIIGVCLALEGYMHYTGHYDWHLSAILGLFY  
AYLGLNIQHDANHGALSANPLVNRLMGMTQNWYGASVTSWVHQHVQHHVHTNDVHLDPDIEGKVVMLNPNRPLKLL  
HAYQWFYFFGLIFLYGFSIVKFSFTTVLEGFYTPFSELLNRYRYQELAWSLFFYFRWFFLPYMAPTWTTFFQIAPMFMIFGFYLS

VFFHISHNYLGVEQLEDTSPKRSWLHNQVVASSNVAGPILGFLNGGLNYQIEHHLFPRIHSHYPTIAPVVRQFCEEKGIPYRHFE  
TVTENVISSIQHMYDIGTNNVPEAAKKLENVKMHARTLSVAG\*

>GCJT01017122.1\_Paracyclopsina\_nana\_Pnana\_mRNA\_18686\_1\_forward

MEPDHGVMDKKHIRVEGKIYSAEKLAELHPGGPLFIQAFSGRDASQAFLSYHRRQFPHKRAEPAYISDDTTVSHDPQDHADFL  
LCQRVDKVLPRMKSFAPWHYYIKVAFILGSAFGLLEYMHINRAYVWYLSALVGLFYALIGLNIQHDANHGAI SRNPWVNRILGM  
SQNWIGGSSISWIHQHVQHHIHTNDLERDPDIAGNAYIRLNPNQKLMRFHIVQHVYFFFLMAIYGFSVVIQTVDNILKGGKHH  
TMSVLLGPHRAFEAVTSALFILRWMVLPVYLTGSFMTLLHTVPMYIVAGYLAFFFTISHNFEGVHMMEDTRRGFNKSSFLYN  
QVVTSSNVGGAFLCMLNGGLNYQIEHHLFPRIQHSHPKIAPVIRAFCEEKGIPYVHFDSINENMASCVKHLIDLGNVNPVHIT  
MISAAN\*

>GDFW01009453.1\_Tigriopus\_sp.\_1\_SL-2012\_Tk\_CDS\_08242-1\_1\_forward

LANGLVIFISFHQRSPGPEVLKMKCPDVKKDLNPTEDIQIGNKFYDVKLKKFHPGGPLFISAFAGRDATQAFISYHRKQFPHQ  
KVEFALERTEKAVEDYDPSVNEDYFELIRRVEKVVPRHKS FATWAYHFKA FVMVSIVVALEAYIH YTGTYKWYLTGALGIGLAI  
LNLIHDAHHGALS KNPKVNRLY GSLQHWYGHCVTTWIHQHVQHHIHTNDIHKDPDINEQKAVRLNPVYPMMKFHAYQWA  
YFFGLFLLFGFSMIAFSLKTALNGFHFTPF SKHLKEYRTL DLVGYWYIYTRWLVIPLIRFPSIWTFLNLP LFI TFGFYLVFF  
YISHNFA  
GVTLLDDTSPNQSWLYNQVTTSSNVAGPILCFINGGLNYQIEHHLFPRMYHGHYPTIAPVVRREFCKEKGIPYRHFP  
TLTNSFIAT  
MEHMYDFGNNVPESTKNLEIKRS\*

>GDFW01009455.1\_Tigriopus\_sp.\_1\_SL-2012\_Tk\_CDS\_08243-1\_1\_forward

MASDLPESIRVEDKIYSARLLAELHPGGPLFVQAFAGRDASTAFLTYHRRQFPHQRAAPAFQSKDES VQYSPDDHADFI  
ELCER  
VDKVLPRMKSFAPWHYFVKGVILGAAFTLEAYMHLTQSYRWFLFAIMGLLYALIGLNIQHDANHGAI SRNPWVNRV  
LGT SQ  
NWIGGSAIAWIHQHVQHHIHTNDIHLDPDISGSTYIRLNPLKPLLKYHFVQHIYFFILLALYGF SIVIQSLENV  
VSGSHHTPMSPL  
KPHRFVETFTWVLFITRWVVLPAQTGSLSVLLQTLPLYMVAGYLAFFFSISHNFNGVHLL EDDTTRPSNKDSSFLY  
KQVSSSNV  
GGSILCFMNGGLNYQIEHHLFPRISHTYYPKIAPT VREFCKEKNIPYVHFPTLGENIRSCTQHLWDMGSHETPK  
NATIQA AKTML  
AH\*

>GDFW01015540.1\_Tigriopus\_sp.\_1\_SL-2012\_Tk\_CDS\_13549-1\_1\_forward

MAPNATGSELRGDSQECFPGDPLPIGEESIRVEDKIYSARTLADLHPGGTLFVKSFAGRDASTAFLSYHRRQFPHSRV  
KEALEKV  
DPNVKVDPHAQDDFLELCERVDKVLPRMKSFAPWYYL KACFIMFMTVGLFYMHYTGNYKWYISALCGWFCALV  
GLNIQHD  
ANHGALS RNPLVNRFWGLSQNWIGGSTISWIHQHVQHHIHTNDVKLDPDIEGRPVVRLNPRKPV LKWHLQHIY  
FFILILGYG  
FSVILSSFTT MLEGINYTPVSKLLKNHRYLEMAFSILYFFRWVVIPLYQVPSLFTILHCAPVLMVTGWYLSFF  
FTLSHNF  
DGV TQLD  
NTQPSKSLYNQVITSSNVAGEWLCFLNGGLNYQIEHHLFPRMHGHYPKIAPVVRREFCQEKGIPYH HFP  
TITENAWACAKHLF  
EMGTEDVPKSAKHIMAS\*

>GFUD01041922.1\_Neocalanus\_flemingeri\_Contig41928\_2\_forward

CSTQPDLLPVCVL\*GE\*LV\*PELVIVIPVIGERGVIL\*ER\*DIVSCRVSADTQHPEGVSDMSPKSNEMMDNHL  
LQSESLTRPGPVA  
AEYIRVESKIYDARRLAELHPGGPLFIKAFAGRDASQAFLSYHRRQFPHSSTKAKAAYERDDETVKYSKEDN  
QDFMELCDRVEKV  
LPRLSSFAPWYYYLKVAFLLCFVVTLEGYMHYNRVYSWKSALMGLFYAWIGLNIQHDANHGAVSRYHWVNRAL  
GASQNWIG  
GSAISWVHQHVQHHMHTNDVNLDPD MAGSAFIRLNPLAPLMKYHIVQHIYFFFLAIYGF SVVIQSF  
LNVVYGSHTAM  
SPL  
LVPHRVFESFMSIIFVCRWVLLPLYQVPELDTFLSTVPMYMVCGYLAFFFSISHNFSGVFMLEDTTREAS  
EDTGTFLYKQV  
VSS  
SNVGGRLVCFNGLNYQIEHHLFPRISHCHYPTISHTVHQYCQEKGIPYVHFNTVWENIRSCTKHLLDLGSHQ  
TPKNVNF  
FEQK  
VKSQ\*ARK\*ELK\*MKMLCNGLR

>GFUD01115445.1\_Neocalanus\_flemingeri\_W4a28933:c0\_g1\_i2\_2\_forward

VTSYTYSEEREWEAGES\*\*SLLSLSMGREELYWY\*HSSS\*RVSDMSPKSNEMMDNHLLQSESLTRPGPVAAESIRVESKIYDARRL  
AELHPGGPLFIKAFAGRSDASQAFSLYHRRQFPHSSTKAKAAYERDDETVKYSKEDNQDFMELCDRVEKVLPRSSFAPWYYLK  
VAFLLSFVVTLEGYMHYNRVYSWKLSAIMGLFYAWIGLNIQHDANHGAVSRVYHVVNRALGASQNWIGGSAISWVHQHVQ  
HHMHTNDVNDLDPDMAGSAFIRLNPLKPLMKYHIVQHIYFFLLAIYGFVVIQSFLNVVYGSHHTAMSPLLVPHRVFESFMSIVF  
VCRWVLLPLYQVPEIDTFLSTVPMYMCVGYLAFFFSISHNFGVFMLEDTTREASSADTGTFLYKQVSSSNVGGVRLCFFNGG  
LNYQIEHHLFPRISHCHYPTIAHTVHQYQCQEKIPYVHFNTVWENIRSCTKHLLDLGSHQTPENVSFQKVKSQ\*ARK\*ELDCM  
KMLHNGLR\*FNNFVFN\*IIINFSVKCSQITPN\*AKTSSPPQ

>HACA01025139.1\_Lepeophtheirus\_salmonis\_mRNA\_for\_putative\_protein,\_similar\_to\_XP\_004994750.1,\_con  
tig\_Lsa.22072,\_3\_forward

KYSAFL\*KIKAVSI\*SLV\*QVVMAPSITTTETIETLKVDTKSCTKPIIGQNSLQVENKIYDAEELARIHPGGKLFVKAFAGRDATAFL  
SYHRKKFPHNKVSFALEGIDPTVSEKDIRDVEDYLELCRRVHRVIPRHKTAPWHYFVKIFALMIITLFLEYNMHYTGAYTWYYA  
SSIGLCYALIGLNIQHDGNHGAVSSKPWLNRLAGLSMNFIGHSSVDWVHQHDVQHIIYTNVDLDPDIDGTPLYRLNPLKPLK  
IHGLQYIYFMIINLYGVTVSFFTLNVIQGMHFTSLSTLAQKYWKLEALGPMLLILRMYIPIRVPSIWTVLNIFLLMGTFGQYVA  
FFFILSHNYVGVHHTQGETKTKSFIYKQVACSSNVGGKLLCFFNGGLNYQIEHHLFPRMCHVHYPTVAPIVRQFCCKEKSIPYNHFP  
TITENFVSTAELLGLGTEIKPTTMKFL\*I\*IWPALNY\*LYLFMTIVGCPHMFLL\*RSNIIAKMX

>HACA01032486.1\_Lepeophtheirus\_salmonis\_mRNA\_for\_putative\_protein,\_similar\_to\_XP\_004994750.1,\_con  
tig\_Lsa.28773\_1,\_3\_forward

FSRKTCKLDF\*YKRFWCWMANDI\*CGF\*YHSTPPFMTSV\*\*D\*LEKRDILIF\*RVIMTPKVAKDEILVEGKIYSAENLAQSHPGG  
KLFVRAFAGLDASTAFLTYHRRKFPHSRAKNALKEDGEDSNNPEGWDEEYLELCRLVEKVIPRMKSFAPWYYVVKVAILSMVA  
IEYMHKNVYHPLLCGFLGYIFAVIGLNIQHDANHGAISSRRPLVNRILGMSQNWIGGSAINWIHQHVQHHIHTNDIDQDPD  
MDGGILIRINAKTPLMKFHIVQHIYFFLLSFYGFVSVIRSLNIVVGKHFPTMSSLFKYRVIEVFSSVFFILRLMVFPYQAPEIQT  
LSLSLMFIVAGYLSLFFAISHNFEVEMNMKNAKSSSILRTQVATSSNVGGEILCFLNGGLNYQIEHHLFPRISHCHYPKIAPVVR  
QFCEERNIPYVHFPSVLDNINSAIKHLVFMGGNAEPPELNTHILASKLQS\*SVIIILLFSLDYKSLKSIPLIHIYHLL\*YGSSPPPSX

>HACA01032487.1\_Lepeophtheirus\_salmonis\_mRNA\_for\_putative\_protein,\_similar\_to\_XP\_004994750.1,\_con  
tig\_Lsa.28773\_2,\_1\_forward

IKTTLFYQSFF\*GKLLVLNECLYITQCCFLIMDILIF\*RVIMTPKVAKDEILVEGKIYSAENLAQSHPGGKLFVRAFAGLDASTAFLTY  
HRRKFPHSRAKNALKEDGEDSNNPEGWDEEYLELCRLVEKVIPRMKSFAPWYYVVKVAILSMVAISIEYMHKNVYHPLLCGFL  
GYIFAVIGLNIQHDANHGAISSRRPLVNRILGMSQNWIGGSAINWIHQHVQHHIHTNDIDQDPDMDGGILIRINAKTPLMKFHI  
VQHIYFFLLSFYGFVSVIRSLNIVVGKHFPTMSSLFKYRVIEVFSSVFFILRLMVFPYQAPEIQTVLSLSLMFIVAGYLSLFFAIS  
HNFEVEMNMKNAKSSSILRTQVATSSNVGGEILCFLNGGLNYQIEHHLFPRISHCHYPKIAPVVRQFCEERNIPYVHFPSVLDNI  
NSAIKHLVFMGGNAEPPELNTHILASKLQS\*SVIIILLFSLDYKSLKSIPLIHIYHLL\*YGSSPPPSX

>HAHV01077442.1\_Tisbe\_holothuriae,\_strain\_RUC.THI1,\_contig\_TRINITY\_DN61994\_c0\_g1\_i1,\_3\_reverse  
KSGPPFLVPAKTESSTTKNVRKYLKPGDSLEDNSFPNQKSICESVQGGSMCPTPKSKSADKLVEAVGRTGGKENSRTGHDEDN  
FGLKTTWQQTAEVDPEQILIEDKFYDAKGLANFHPGGPLFLKAFAGRDATAFLSYHRKKFPHQRVEKYLQDSSIEYDGNED  
FLELCKRVEKVIPRSKSFAPWSYLLKAIWIWGTAIWLEARMHQGNYPWYEAVALGFFWALIGLNIQHDANHGSLSANPVVNR  
WGLGNNWYGSAISWIHQHVQHHVHTNDVHLDPDIEGKSPILRLNYPQPLETSYQHIYFFLLILAFGYNIYQAVLTIITYTN  
KSIFSSLLKPYILQEHLWNIFIFRWFLPLFTSGGDPWVYARIFPMFAVFGSYLSFFFHISHNFQVEQLEDTSKHSFLYNQLITSS  
NVCGWKLAVLNGGLNYQIEHHLFPRMHSHYATASPIVREFCREKGYPYHEFKTIAENVRSCIKHLRDRYGSNRIPEAAQKLNIAEI  
KKEQNEX

>GHAJ01038079.1\_Apocyclops\_royi\_TRINITY\_DN52334\_c0\_g1\_i1\_2\_[moltype=transcribed\_RNA]\_2\_forward

NRFGSQTKQILLRS\*KKVVSETF\*PVSKNNTAQTlnfvykctrrkhr\*HRNSSFTFILSTI\*IFHLTMPsrVpDELIRVEDKLYSAQQ  
LAKIHPGGPLFVKAFAGRDSSQAFLSYHRKPFPHNRAKEAFYAVDKSVDYSEKDNQDFLELCELINKVLPKGKSFAPWHYFVKIGI  
LTLVTVILEFYIHYTASYKWHLTALLGFLFALIGLNIQHDANHGAIslNPNVnrflgtfQnWIGGSAISWIHQHVQHHIHTNDV  
RLDPDIALEFYVRLNPTHPLLKfQlfQYfyffiliafygvlkvVLSIEDVLSWKHYTPMS  
>GHAJ01038078.1\_Apocyclops\_royi\_TRINITY\_DN52334\_c0\_g1\_i2\_1\_[moltype=transcribed\_RNA]\_1\_forward  
MKLSLEDVEN\*VPQNLSSVTKQIFHLTMPsrVpDELIRVEDKLYSAQQLAKIHPGGPLFVKAFAGRDSSQAFLSYHRKPFPHNRA  
KEAFYAVDKSVDYSEKDNQDFLELCELINKVLPKGKSFAPWHYFLKIGILTTLVTVILEFYIHYTASYKWHLTALLGFLFALIGLNIQHD  
ANHGAIslNPNVnrflgtfQnWIGGSAISWIHQHVQHHIHTNDVRLDPDIALEFYVRLNPTHPLLKfQlfQYfyffiliafygvl  
KVLSIEDVLSWKHYTPMS  
>GHAJ01038077.1\_Apocyclops\_royi\_TRINITY\_DN52334\_c0\_g2\_i2\_1\_[moltype=transcribed\_RNA]\_1\_forward  
IIYTPDGRWWISLVNIPMAMVAGYYLSFFFTISHNFRGVHMHEDTRRETnQNSFLYNQVSSSNVGGSWLcFLNGGLNYQI  
EHHLFPRINHTHYPTIAPHVKKFCDERKIPYVHFTTIDANLRACIKHLMDMGESEMPNSVMEKAATKMPIVS\*AT\*CPSTLQH  
PTPPDVQSPPENEKTY\*\*KKKDFLRLHCYVAK\*HTIRVQKQTQLPEKNSSMCTYIFNYSEEAV\*KIVHLSCLKSNITF\*MDPAH  
CHCPKALLFRWGSIEAYFI\*ATLF\*ELRRQPIAAIGISMTLAGLSAESTILNMTATVWE\*RQGSEFCASIKKLCEIMDDVRWKFFIM  
ND\*SIINYNNQKYVLINyKESAA\*EDSLEFSKILLRETKSEIFNYF\*STSIS\*LLNRIEGY\*LKWQVLRs\*LQFSF\*N\*FLLCLISTYI  
CSNPMQCKTIKCFYCVFIRVLGIRNMERLKVQPWYDRRVR\*SSTIVPNNFVPRIWSSILLYFAAVLSYHTGKKGPP  
>GHAJ01039406.1\_Apocyclops\_royi\_TRINITY\_DN55045\_c0\_g3\_i1\_3\_[moltype=transcribed\_RNA]\_3\_forward  
IIILGAAFSLEFYIHFTGSYIWYLTAVLGFVFALIGLNIQHDANHGAIslRRAWVnrflGKSQnWIGGSTVSWIHQHVQHHVHTN  
DLELDPDIAIEFYIRLNPRHPLLKfHVFQYIYFFLIAALFGLQKIMTSLGDVLSWHHYTPIANELRKYAWEEWIFTVVYIIRWVVLPPF  
MVAPGQAVNYVFSWVVMNMVMGYLSFFFTISHNFEG  
>GHAJ01039408.1\_Apocyclops\_royi\_TRINITY\_DN55045\_c0\_g3\_i2\_1\_[moltype=transcribed\_RNA]\_1\_forward  
YTTKDNDDFLDLCSRVEKILPRSKAFAPWHYLLKAIILGAAFSLEFYIHYTGSYIWYLTAVLGFVFALIGLNIQHDANHGAIslRRAW  
VnrflGKSQnWIGGSTVSWIHQHVQHHVHTNDLELDPDIAIEFYVRLNPRHPLLKfHVFQYIYFFLIAALFGLQKIMTSLGDVL  
SWHHFTPIANELRKYAWEEWIFTVVYIIRWVVLPMVSPGQAVNYVFSWVVMNMVMGYLSFFFTISHNFEGVEX  
>GHAJ01039407.1\_Apocyclops\_royi\_TRINITY\_DN55045\_c0\_g5\_i1\_3\_[moltype=transcribed\_RNA]\_3\_forward  
HLFPRINHTHYIAPVVRQFCEERKIPYTHFESVPQNVRALVQHLAEMGSNKNFNIEGFVNPSEKVSAKMHIVS\*TPKILWFVEL  
\*NRQKASFDVATKTESITRYNFRISIPCIEMKISPC\*QIKCILLF\*QSSNINAEIYVF\*SITHFFYINV\*LT\*TY\*RDVANDLILIKS\*LGT  
ILK\*EIVLRSSKLLRRYSYFTHFSKNFSPSLKVVLAA  
>NA\_Apocyclops\_royi\_NODE\_1\_length\_2498\_cov\_171.314227\_g0\_i0\_complete\_gene\_3\_reverse  
ETF\*PVSKNNTAQTlnfvykctrrkhr\*HRNSSFTFILSTI\*IFHLTMPsrVpDELIRVEDKLYSAQQLAKIHPGGPLFVKAFAGRD  
SSQAFLSYHRKPFPHNRAKEAFYAVDKSVDYSEKDNQDFLELCELINKVLPKGKSFAPWHYFLKIGILTTLVTVILEFYIHYTASYKW  
HLTALLGFLFALIGLNIQHDANHGAIslNPNVnrflgtfQnWIGGSAISWIHQHVQHHIHTNDVRLDPDIALEFYVRLNPTHPL  
LKfQlfQYfyffiliafygvlkvVLSIEDVLSWKHYTPMSRLLKSYQSFEVLGSAVFMLRWIALPIIYTPDGRWWISLVNIPMAMV  
AGYYLSFFFTISHNFRGVHMHEDTRRETnQNSFLYNQVSSSNVGGSWLcFLNGGLNYQIEHHLFPRINHTHYPTIAPHVKKF  
CDERKIPYVHFTTIDANLRACIKHLMDMGESEMPNSVMEKAATKMPIVS\*AT\*CPSTLQHPTPPDVQSPPENEKTY\*\*KKKDF  
LRLHCYVAK\*HTIRVQKQTQLPEKNSSMCTYIFNYSEEAV\*KIVHLSCLKSNITF\*MDPAHCHCPNALLFRWCSIEAYFI\*ATLF\*  
ELRRQPIAAIGISMTLAGLSAESTILNMTATVWE\*RQGSEFCASLKKLCEIMDDVRWKFFIMND\*SIINYNNQKYVLINyKESAA  
\*EDSLEFSKILLRETKSEIFNYF\*STSIS\*LLNRIEGY\*LKWQVLRs\*LQFSF\*N\*FLLCLISTYI\*CSNPMQCKTIKCFYCVFIRVLGI  
RNMERLKVQPWYDRRVR\*SSTIVPNNFVPRIWSSILLYFAAVLSYHTGKKGP  
>NA\_Apocyclops\_royi\_NODE\_1\_length\_1925\_cov\_185.031857\_g0\_i0\_complete\_gene\_1\_reverse

FLLQMIELFVFFKVF\*TVLADRAIFALPLSEKICLPQSSKSENQNSFLGVQGFRIKDCINMSEVPEGQIRIEDKVYSAEKLSKLHP  
GGPVFIKAFSGRDASQAFLSYHRRNFPHGSKPAKESFLLQDKSIKYTTKDNDDFLDLCSRVEKILPRSKAFAPWHYYLKAIILGAAF  
SLEFYIHFTGSIWYLTAVLGFVFALIGLNIQHDANHGAIARRAWVNRLFQKSQNWIGGSTVSWIHQHVQHHVHTNDLELDP  
DIAIEFYIRLNPRHPLLKFHVQYIYFFLIAALFGLQKIMTSLGDVLSWHHYTPIANELRKYAWEEWIFTVVYIIRWVVLPPFMVAP  
GQAVNYVFSWVVMNMVMGYLSFFFTISHNFEGVEKHEDTRRPVNAHKSFLYNQVAASSNVAGFWLAILNGGLNYQIEHHL  
FPRINHHTHYYYIAPVVRQFCEERKIPYTHFESVPQNVRALVQHLAEMGSNKNFNIEGFVNPSEKVSAMHIVS\*TPKILWFVEL\*  
NRQKASFDVATKTESITRYKFRISIPCIEMKISPC\*QIKCILLF\*QSSNINAEIYVF\*SITHFFYINV\*LT\*TY\*RDAVNDLILIKS\*LG  
TILK\*EIVLRSSKLRYSYFTHFSKNFSPSLKVVLA

>NA\_Apocyclops\_royi\_NODE\_2\_length\_1925\_cov\_171.963823\_g0\_i1\_complete\_gene\_1\_reverse

FLLQMIELFVFFKVF\*TVLADRAIFALPLSEKICLPQSSKSENQNSFLGVQGFRIKDCINMSEVPEGQIRIEDKVYSAEKLSKLHP  
GGPVFIKAFSGRDASQAFLSYHRRNFPHGSKPAKESFLLQDKSIKYTTKDNDDFLDLCSRVEKILPRSKAFAPWHYYLKAIILGAAF  
SLEFYIHFTGSIWYLTAVLGFVFALIGLNIQHDANHGAIARRAWVNRLFQKSQNWIGGSTVSWIHQHVQHHVHTNDLELDP  
DIAIEFYVRLNPRHPLLKFHVQYIYFFLIAALFGLQKIMTSLGDVLSWHHFTPIANELRKYAWEEWIFTVVYIIRWVVLPPFMVSP  
GQAVNYVFSWVVMNMVMGYLSFFFTISHNFEGVEKHEDTRRPVNAHKSFLYNQVAASSNVAGFWLAILNGGLNYQIEHHL  
FPRINHHTHYYYIAPVVRQFCEERKIPYTHFESVPQNVRALVQHLAEMGSNKNFNIEGFVNPSEKVSAMHIVS\*TPKILWFVEL\*  
NRQKASFDVATKTESITRYKFRISIPCIEMKISPC\*QIKCILLF\*QSSNINAEIYVF\*SITHFFYINV\*LT\*TY\*RDAVNDLILIKS\*LG  
TILK\*EIVLRSSKLRYSYFTHFSKNFSPSLKVVLA
